# Supplementary material for: Carbon nano-ink coated open cell polyurethane foam with micro-architectured multilayer skeleton for damping applications
Source: Royal Society of Chemistry journal article supplement (doi:10.1039/c6ra15868d), 2016-01-01

### Supplementary File

The SEM images show below were taken from the centre(left) and the edge(right) of the sample coated with 0.1wt% ink. Rather similar surface morphologies are observed indicating that the dip-coating process we have adopted is an effective one with little/negligible filtering-effect.

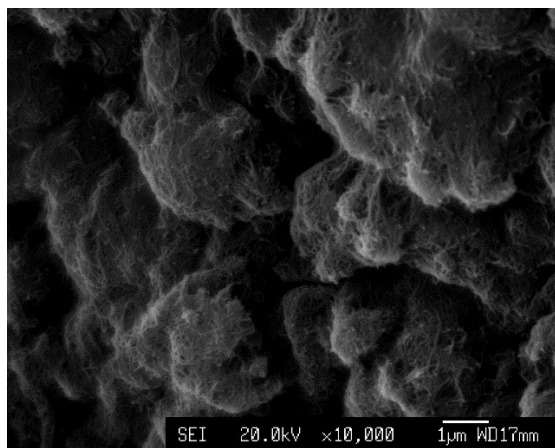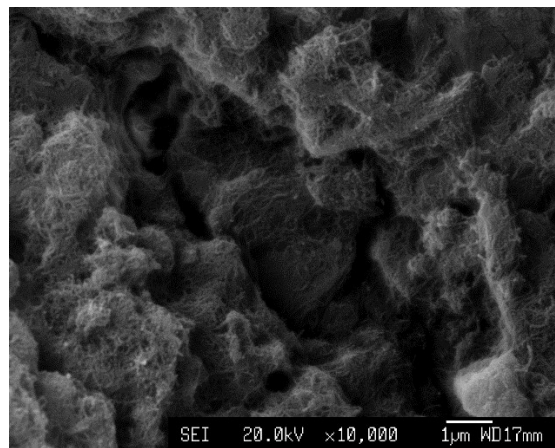

Supplement: c6ra15868d1.pdf [file c6ra15868d1.pdf]
